# Supplementary material for: Influenza- and COVID-19-Associated Pulmonary Aspergillosis: Are the Pictures Different?
Source: MDPI journal article supplement (doi:10.3390/jof7050388), 2021-05-15
Supplement: s1 [file s1]

Table S1. Mycological arguments for invasive pulmonary aspergillosis associated to influenza pneumonia (IAPA) and COVID-19 (CAPA) and classification.

| Patient | Age/Sex | Positive Respiratory Samples                                                                                                                                                                        | Blood Samples       | IAPA Classification | CAPA Classification |
|---------|---------|-----------------------------------------------------------------------------------------------------------------------------------------------------------------------------------------------------|---------------------|---------------------|---------------------|
| #1      | 57/F    | Positive culture with <i>A. fumigatus</i> : 1 BAL and 1 TBA<br>Positive BAL for: 1 x GM $\geq$ 1 ; 1 x <i>A. fumigatus</i> PCR                                                                      | 1 x Positive GM>0.5 | Probable IAPA*      |                     |
| #2      | 40/M    | Positive culture with <i>A. fumigatus</i> : 1 TBA<br>Positive TBA for: 1 x <i>A. fumigatus</i> PCR                                                                                                  | Negative ( x 3)     | Putative IPA**      |                     |
| #3      | 63/M    | Positive culture with <i>A. fumigatus</i> : 1 BAL and 1 TBA<br>Positive BAL for: 2 x GM $\geq$ 1 ; 1 x <i>A. fumigatus</i> PCR                                                                      | 1 x Positive GM>0.5 | Probable IAPA       |                     |
| #4      | 54/F    | Positive culture with <i>A. fumigatus</i> : 1 BAL and 1 TBA<br>Positive BAL for: 1 x GM $\geq$ 1 ; 1 x <i>A. fumigatus</i> PCR                                                                      | Negative ( x 1)     | Probable IAPA       |                     |
| #5      | 69/M    | Positive BAL for: 1 x GM $\geq$ 1<br>Positive TBA for: 1 x GM $\geq$ 1                                                                                                                              | Negative ( x 3)     | Probable IAPA       |                     |
| #6      | 58/M    | Positive culture with <i>A. fumigatus</i> : 1 BAL<br>Positive BAL for: 1 x GM $\geq$ 1 ; 1 x <i>A. fumigatus</i> PCR                                                                                | 2 x Positive GM>0.5 | Probable IAPA       |                     |
| #7      | 67/F    | Positive BAL for: 1 x GM $\geq$ 1                                                                                                                                                                   | 2 x Positive GM>0.5 | Probable IAPA       |                     |
| #8      | 49/M    | Positive culture with <i>A. fumigatus</i> : 1 TBA<br>Positive TBA for: 1 x GM $\geq$ 1                                                                                                              | Negative ( x 4)     | Putative IPA        |                     |
| #9      | 34/F    | Positive culture with <i>A. fumigatus</i> : 1 BAL<br>Positive BAL for: 1 x GM $\geq$ 1 ; 1 x <i>A. fumigatus</i> PCR                                                                                | Negative ( x 2)     | Probable IAPA       |                     |
| #10     | 60/M    | Positive culture with <i>A. fumigatus</i> : 1 TBA<br>Positive TBA for: 2 x GM $\geq$ 1 ; 2 x <i>A. fumigatus</i> PCR                                                                                | Negative ( x 5)     | Putative IPA        |                     |
| #11     | 67/M    | Hyphae consistent with <i>Aspergillus</i> in a TBA<br>Positive culture with <i>A. fumigatus</i> : 1 TBA<br>Positive TBA for: 1 x <i>A. fumigatus</i> PCR                                            | Negative ( x 1)     | Probable IAPA       |                     |
| #12     | 51/M    | Positive culture with <i>A. fumigatus</i> : 1 BAL<br>Positive BAL for: 1 x <i>A. fumigatus</i> PCR                                                                                                  | Negative ( x 1)     | Probable IAPA       |                     |
| #13     | 52/M    | Positive culture with <i>A. fumigatus</i> : 1 BAL<br>Positive BAL for: 2 x GM $\geq$ 1; 1 x <i>A. fumigatus</i> PCR                                                                                 | 1 x Positive GM>0.5 | Probable IAPA       |                     |
| #14     | 63/F    | Hyphae consistent with <i>Aspergillus</i> in 1 TBA<br>Positive culture with <i>A. fumigatus</i> : 1 TBA<br>Positive TBA for: 1 x GM $\geq$ 1                                                        | 1 x Positive GM>0.5 | Probable IAPA       |                     |
| #15     | 57/F    | Positive culture with <i>A. fumigatus</i> : 1 BAL, 1 TBA and 1 sputum<br>Positive BAL for: 1 x GM $\geq$ 1; 1 x <i>A. fumigatus</i> PCR<br>Positive TBA and sputum for: 1 x <i>A. fumigatus</i> PCR | 2 x Positive GM>0.5 | Probable IAPA       |                     |

|     |      |                                                                                                                                                                                 |                     |               |               |
|-----|------|---------------------------------------------------------------------------------------------------------------------------------------------------------------------------------|---------------------|---------------|---------------|
|     |      | Hyphae consistent with <i>Aspergillus</i> in a 1 BAL, 1 TBA and 1 sputum                                                                                                        |                     |               |               |
| #16 | 62/M | Positive culture with <i>A. fumigatus</i> : 1 TBA and 1 sputum<br>Positive BAL for: 1 x GM $\geq$ 1<br>Positive TBA and sputum for: 1x GM $\geq$ 1; 1 x <i>A. fumigatus</i> PCR | Negative ( x 1)     | Probable IAPA |               |
| #17 | 60/M | Positive culture with <i>A. fumigatus</i> : 2 TBA<br>Positive TBA for: 1 x GM $\geq$ 1                                                                                          | Negative ( x 3)     | Putative IPA  |               |
| #18 | 48/F | Positive culture with <i>A. fumigatus</i> : 1 TBA<br>Positive TBA for: 5 x <i>A. fumigatus</i> PCR                                                                              | Negative ( x 1)     |               | Possible CAPA |
| #19 | 78/F | Positive culture with <i>A. fumigatus</i> : 2 TBA<br>Positive TBA for: 2 x <i>A. fumigatus</i> PCR                                                                              | 1 x Positive GM>0.5 |               | Probable CAPA |
| #20 | 78/F | Positive culture with <i>A. fumigatus</i> : 4 TBA<br>Positive TBA for: 4 x GM $\geq$ 1.2 (2 x >4.5); 6 x <i>A. fumigatus</i> PCR                                                | Negative ( x 2)     |               | Possible CAPA |
| #21 | 71/M | Positive culture with <i>A. fumigatus</i> : 1 TBA<br>Positive TBA for: 1 x <i>A. fumigatus</i> PCR                                                                              | Negative ( x 2)     |               | Possible CAPA |
| #22 | 73/M | Positive culture with <i>A. fumigatus</i> : 2 TBA<br>Positive TBA for: 4 x GM $\geq$ 1.2 ; 5 x <i>A. fumigatus</i> PCR                                                          | Negative ( x 1)     |               | Possible CAPA |
| #23 | 75/M | Positive culture with <i>A. fumigatus</i> : 4 TBA<br>Positive TBA for: 2 x <i>A. fumigatus</i> PCR                                                                              | Negative ( x 2)     |               | Possible CAPA |
| #24 | 53/M | Positive TBA for: 1 x GM $\geq$ 1.2; 1 x <i>A. fumigatus</i> PCR                                                                                                                | Negative ( x 1)     |               | Possible CAPA |
| #25 | 46/F | Positive culture with <i>A. fumigatus</i> : 1 sputum                                                                                                                            | 1 x Positive GM>0.5 |               | Probable CAPA |
| #26 | 82/F | Hyphae consistent with <i>Aspergillus</i> in a 1 BAL<br>Positive culture with <i>A. fumigatus</i> : 1 TBA<br>Positive TBA for: 3 x <i>A. fumigatus</i> PCR                      | Negative ( x 1)     |               | Probable CAPA |
| #27 | 69/M | Positive culture with <i>A. fumigatus</i> : 5 TBA<br>Positive TBA for: 5 x GM $\geq$ 1.2 (5 x >4.5); 7 x <i>A. fumigatus</i> PCR                                                | 2 x Positive GM>0.5 |               | Probable CAPA |

GM: galactomannan. BAL: broncho-alveolar lavage ; TBA : tracheo-bronchial aspiration.\* Probable IAPA: According to Verweij et al. (7). \*\*Putative IPA: according to Blot et al. (3)

Table S2. Summary of reported cases of influenza associated pulmonary aspergillosis (IAPA) and COVID-19 associated pulmonary aspergillosis (CAPA).

| Case number | Age/<br>Sex | SAPS-II<br>at ICU<br>Admission | Corticosteroids<br>before IA | Aspergillosis<br>Risk Factors  | Delay before<br>IPA,<br>Days | Aspergillosis<br>Classification | Radiological Evidence                                                                                                                    | Antifungal<br>Therapy                    | Outcome<br>(day 90) |
|-------------|-------------|--------------------------------|------------------------------|--------------------------------|------------------------------|---------------------------------|------------------------------------------------------------------------------------------------------------------------------------------|------------------------------------------|---------------------|
| 1           | 57/F        | 60                             | Hydrocortisone,<br>13d       | Chemotherapy, breast<br>cancer | 7                            | Probable<br>IAPA*               | Diffuse reticular or alveolar opacities<br>well-shaped nodules                                                                           | Voriconazole,<br>3d                      | dead                |
| 2           | 40/M        | 22                             | Hydrocortisone,<br>5d        | Severe cirrhosis               | 10                           | Putative<br>IPA**               | Diffuse reticular or alveolar opacities,<br>pleural fluid, wedge-shaped infiltrate<br>cavitation and tree in bud                         | Voriconazole,<br>17d                     | alive               |
| 3           | 63/M        | 82                             | Hydrocortisone,<br>5d        | n                              | 4                            | Probable<br>IAPA                | Diffuse reticular or alveolar opacities,<br>Wedge-shaped infiltrate, cavitation<br>and tree in bud                                       | Voriconazole +<br>isavuconazole,<br>117d | alive               |
| 4           | 54/F        | 86                             | n                            | n                              | 3                            | Probable<br>IAPA                | Diffuse reticular or alveolar opacities<br>and wedge-shaped infiltrate                                                                   | Voriconazole,<br>60d                     | alive               |
| 5           | 69/M        | 65                             | n                            | Hodgkin Lymphoma               | 5                            | Probable<br>IAPA                | Diffuse reticular or alveolar opacities<br>well-shaped nodules and cavitation                                                            | Voriconazole,<br>14d                     | dead                |
| 6           | 58/M        | 47                             | Hydrocortisone,<br>3d        | n                              | 3                            | Probable<br>IAPA                | Diffuse reticular or alveolar opacities<br>and wedge-shaped infiltrate                                                                   | Voriconazole,<br>2d                      | dead                |
| 7           | 67/F        | 64                             | n                            | Myeloma                        | 3                            | Probable<br>IAPA                | Diffuse reticular or alveolar opacities,<br>wedge-shaped infiltrate, pleural fluid,<br>well-shaped nodules, halo sign and<br>tree in bud | Voriconazole,<br>9d                      | dead                |
| 8           | 49/M        | 61                             | Hydrocortisone,<br>9d        | Chronic lymphocytic leukemia   | 4                            | Putative<br>IAPA                | Diffuse reticular or alveolar opacities,<br>nonspecific infiltrates and consolidation                                                    | Voriconazole,<br>54d                     | alive               |
| 9           | 34/F        | 47                             | Methylprednisolone, 20d      | n                              | 2                            | Probable<br>IAPA                | Diffuse reticular or alveolar opacities,<br>wedge-shaped infiltrate, pleural fluid,<br>well-shaped nodules and tree in bud               | Voriconazole,<br>42d                     | alive               |

|    |      |    |                                                 |                                              |    |                  |                                                                                                                                          |                                          |       |
|----|------|----|-------------------------------------------------|----------------------------------------------|----|------------------|------------------------------------------------------------------------------------------------------------------------------------------|------------------------------------------|-------|
| 10 | 60/M | 37 | Hydrocortisone,<br>7d                           | n                                            | 2  | Putative IPA     | Diffuse reticular or alveolar opacities,<br>nonspecific infiltrates and consolida-<br>tion, pleural fluid and wedge-shaped<br>infiltrate | Voriconazole,<br>47d                     | alive |
| 11 | 67/M | 48 | Hydrocortisone,<br>8d                           | Corticosteroids<br>+ TNF alpha<br>inhibitors | 1  | Probable<br>IAPA | Diffuse reticular or alveolar opacities<br>and tree in bud                                                                               | Voriconazole,<br>14d                     | dead  |
| 12 | 51/M | 58 | Hydrocortisone<br>+ methylpredni-<br>solone, 5d | Hodgkin lym-<br>phoma                        | 0  | Probable<br>IAPA | Diffuse reticular or alveolar opacities,<br>well-shaped nodules, halo sign and<br>tree in bud                                            | Voriconazole,<br>42d                     | alive |
| 13 | 52/M | 68 | Methylpredniso-<br>lone, 8d                     | n                                            | 0  | Probable<br>IAPA | Diffuse reticular or alveolar opacities,<br>wedge-shaped infiltrate, well-shaped<br>nodules and cavitation                               | Voriconazole,<br>17d                     | alive |
| 14 | 63/F | 59 | n                                               | n                                            | 2  | Probable<br>IAPA | Diffuse reticular or alveolar opacities,<br>pleural fluid, wedge-shaped infiltrate<br>and cavitation                                     | Voriconazole,<br>5d                      | dead  |
| 15 | 57/F | 32 | Hydrocortisone,<br>20d                          | Myeloma                                      | 2  | Probable IPA     | Diffuse reticular or alveolar opacities,<br>nonspecific infiltrates and consolida-<br>tion and wedge-shaped infiltrate                   | Voriconazole,<br>16d                     | dead  |
| 16 | 62/M | 29 | n                                               | n                                            | 9  | Probable<br>IAPA | Diffuse reticular or alveolar opacities,<br>wedge-shaped infiltrate and cavitation                                                       | Voriconazole +<br>amphotericin B,<br>42d | alive |
| 17 | 60/M | 42 | n                                               | n                                            | 17 | Putative IPA     | Diffuse reticular or alveolar opacities,<br>nonspecific infiltrates and consolida-<br>tion, pleural fluid and wedge-shaped<br>infiltrate | Voriconazole,<br>32d                     | dead  |
| 18 | 48/F | 86 | Methylpredniso-<br>lone, 20d                    | Lung trans-<br>plantation                    | 6  | Possible<br>CAPA | Nonspecific infiltrates and consolida-<br>tion and Wedge-shaped infiltrate                                                               | Isavuconazole,<br>42d                    | alive |

|    |      |    |                              |                                          |    |                  |                                                                                                                                       |                                         |       |
|----|------|----|------------------------------|------------------------------------------|----|------------------|---------------------------------------------------------------------------------------------------------------------------------------|-----------------------------------------|-------|
| 19 | 78/F | 81 | Hydrocortisone,<br>7d        | Chronic<br>myelo-mono-<br>cytic leukemia | 13 | Probable<br>CAPA | Diffuse reticular or alveolar opacities<br>and nonspecific infiltrates and consoli-<br>dation                                         | Voriconazole,<br>2d                     | dead  |
| 20 | 78/F | 37 | n                            | n                                        | 4  | Possible<br>CAPA | Diffuse reticular or alveolar opacities<br>and Wedge-shaped infiltrate                                                                | Voriconazole,<br>21d                    | dead  |
| 21 | 71/M | 35 | n                            | n                                        | 13 | Possible<br>CAPA | Diffuse reticular or alveolar opacities,<br>nonspecific infiltrates, consolidation,<br>pleural fluid and wedge-shaped infil-<br>trate | Voriconazole,<br>42d                    | alive |
| 22 | 73/M | 34 | Methylpredniso-<br>lone, 7d  | n                                        | 21 | Possible<br>CAPA | Diffuse reticular or alveolar opacities<br>and pleural fluid                                                                          | Isavuconazole,<br>42d                   | alive |
| 23 | 75/M | 42 | Methylpredniso-<br>lone, 30d | n                                        | 5  | Possible<br>CAPA | Diffuse reticular or alveolar opacities<br>and Wedge-shaped infiltrate                                                                | Voriconazole,<br>42d                    | alive |
| 24 | 53/M | 17 | n                            | n                                        | 3  | Possible<br>CAPA | Diffuse reticular or alveolar opacities<br>and wedge-shaped infiltrate                                                                | none                                    | alive |
| 25 | 46/F | 57 | Methylpredniso-<br>lone, 10d | n                                        | 28 | Probable<br>CAPA | Nonspecific infiltrates and consolida-<br>tion and wedge-shaped infiltrate                                                            | none                                    | alive |
| 26 | 82/F | 72 | Hydrocortisone,<br>10d       | n                                        | 1  | Probable<br>CAPA | Diffuse reticular or alveolar opacities<br>and Wedge-shaped infiltrate and<br>pleural fluid                                           | Voriconazole +<br>isavuconazole,<br>42d | dead  |
| 27 | 69/M | 30 | n                            | n                                        | 1  | Probable<br>CAPA | Diffuse reticular or alveolar opacities<br>and Nonspecific infiltrates and consol-<br>idation                                         | Voriconazole +<br>isavuconazole,<br>42d | alive |

\* Probable IAPA: According to Verweij et al. (7). \*\*Putative IPA: according to Blot et al. (3).

Table S3. Comparison of CT-scan features of CAPA patients at admission and at diagnosis.

|                                               | CT Scan at Admission<br>( <i>n</i> = 9) | CT Scan at CAPA Diagnosis<br>( <i>n</i> = 10) | <i>P</i> Value |
|-----------------------------------------------|-----------------------------------------|-----------------------------------------------|----------------|
| Typical COVID-19 pattern                      | 7 (78%)                                 | 3 (30%)                                       | 0.07           |
| Diffuse reticular or alveolar opacities       | 7 (78%)                                 | 10 (100%)                                     | 0.21           |
| Wedge-shaped segmental or lobar consolidation | 6 (66.7%)                               | 7 (70.0%)                                     | 0.86           |
| Well-circumscribed nodule(s)                  | 0 (0.0%)                                | 0 (0.0%)                                      | 0.99           |
| Halo sign                                     | 0 (0.0%)                                | 1 (10.0%)                                     | 0.99           |
| Cavitation                                    | 0 (0.0%)                                | 0 (0.0%)                                      | 0.99           |
| Air-crescent sign                             | 0 (0.0%)                                | 0 (0.0%)                                      | 0.99           |
| Tree in bud                                   | 0 (0.0%)                                | 0 (0.0%)                                      | 0.99           |
| Bronchial wall thickening                     | 1 (11.1%)                               | 1 (10.0%)                                     | 0.99           |
| Pleural effusion                              | 1 (11.1%)                               | 4 (40.0%)                                     | 0.3            |

Data are presented as n (%). *P* values comparing CT-scan analysis of CAPA patients at admission versus CT-scan of these patients at IPA diagnosis. CT-scan: computerized-tomography scanner .
